# Supplementary material for: Data processing made easy: standalone tool for automated calculation of isotope ratio from transient signals – IsoCor
Source: Royal Society of Chemistry journal article supplement (doi:10.1039/d2ja00208f), 2022-01-01
Supplement: d2ja00208f1.pdf [file d2ja00208f1.pdf]

## Data processing made easy: standalone tool for automated calculation of isotope ratio from transient signals – IsoCor

Dariya Tukhmetova<sup>1</sup>, Jan Lisec<sup>2</sup>, Jochen Vogl<sup>1</sup>, Björn Meermann<sup>1\*</sup>

<sup>1</sup>Federal Institute for Materials Research and Testing (BAM) - Division 1.1 - Inorganic Trace Analysis, Richard-Willstätter-Str. 11, 12489 Berlin, Germany

<sup>2</sup>Federal Institute for Materials Research and Testing (BAM) - Division 1.7 - Organic Trace and Food Analysis, Richard-Willstätter-Str. 11, 12489 Berlin, Germany

\*Corresponding author: Dr. Björn Meermann, email: bjoern.meermann@bam.de

### Supplementary Information

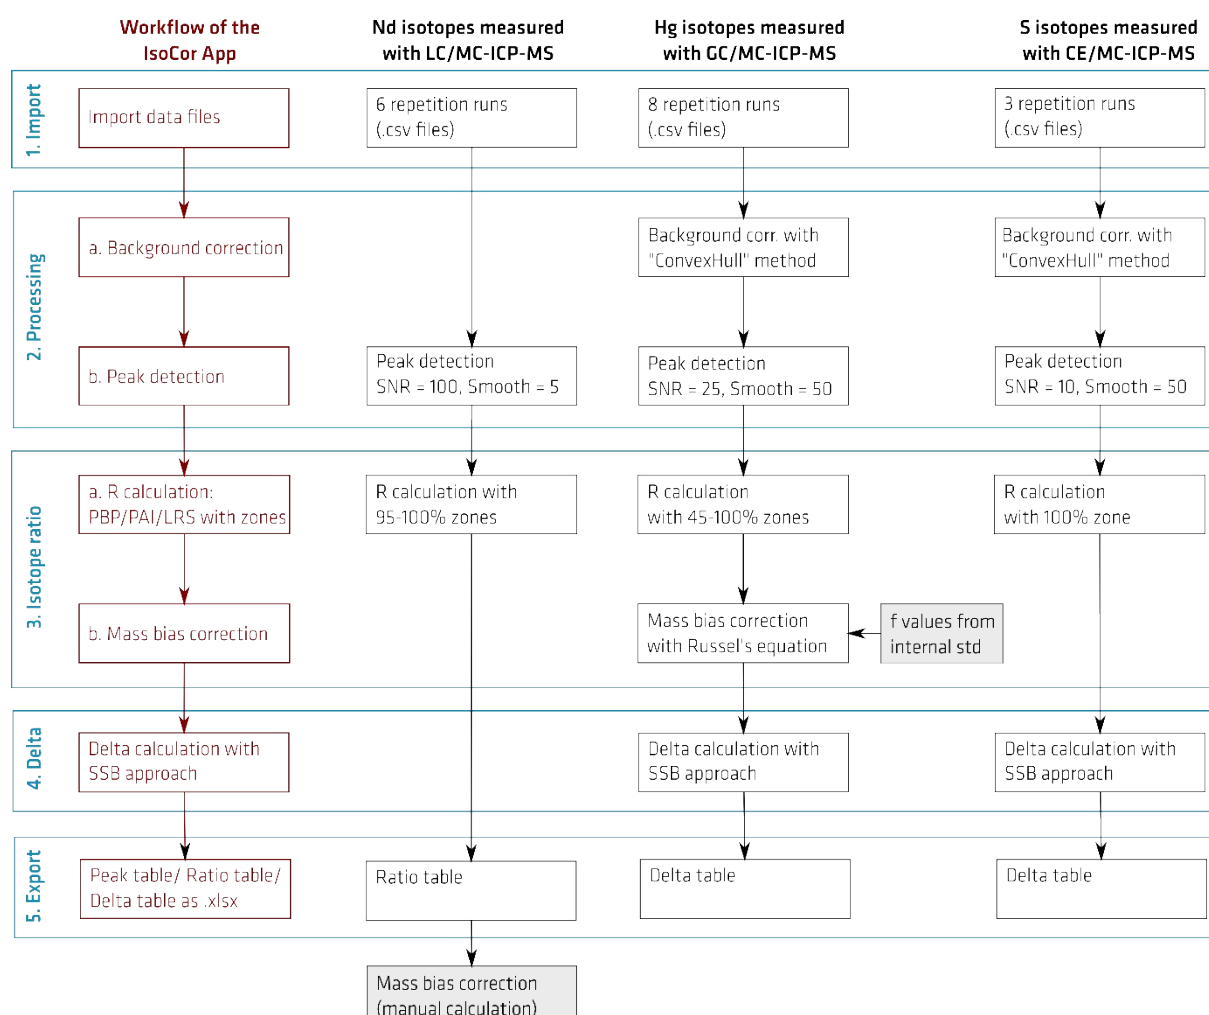

Suppl. Figure 1: Schematic data processing workflow applied to each dataset.

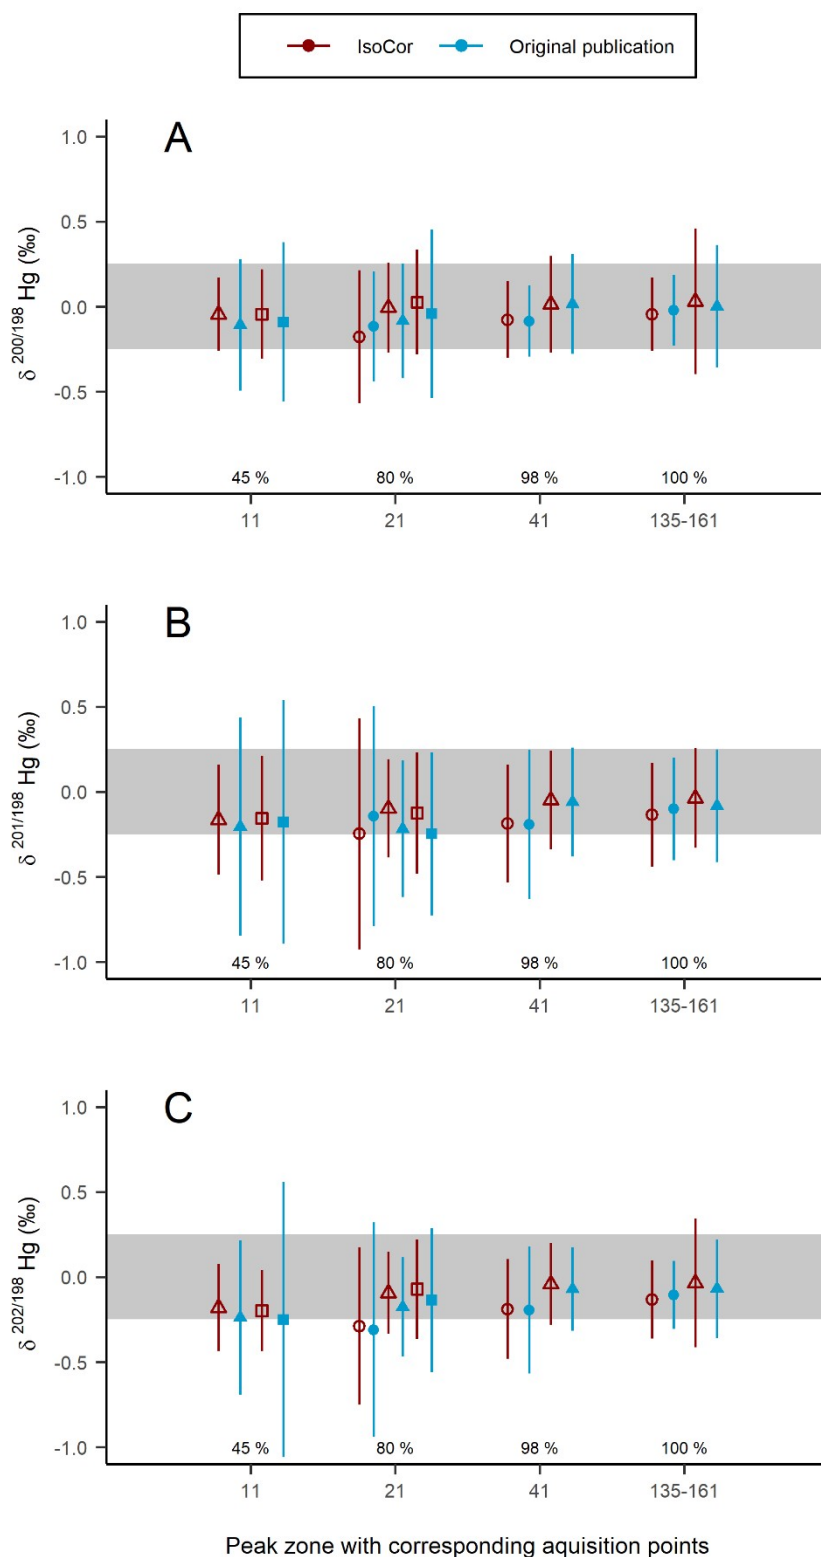

**Suppl. Figure 2:** Comparison of  $\delta^{200/198}\text{Hg}$  (A),  $\delta^{201/198}\text{Hg}$  (B) and  $\delta^{202/198}\text{Hg}$  (C) values assessed with IsoCor and published by the authors from isotopic analysis with GC/MC-ICP-MS. Shape of the point indicates isotope ratio calculation method: circle is LRS, triangle is PAI, square is PBP. Error bars represent external precision as standard deviation for N = 8. Optimal external precision is  $\pm 0.25\%$ .
